# Supplementary material
Source: PubMed Central journal article supplement (PMC4808410)
Supplement: NIHMS748210-supplement-Supp_Info.pdf [file NIHMS748210-supplement-Supp_Info.pdf]

**Supporting information for:**  
**LICHEM: A QM/MM Program for Simulations**  
**with Multipolar and Polarizable Force Fields**

Eric G. Kratz,<sup>†</sup> Alice R. Walker,<sup>†</sup> Louis Lagardère,<sup>‡,¶</sup> Filippo Lipparini,<sup>‡</sup>  
Jean-Philip Piquemal,<sup>‡</sup> and G. Andrés Cisneros<sup>\*,†</sup>

*Department of Chemistry, Wayne State University, Detroit, MI 48202, Laboratoire de  
Chimie Théorique, UPMC Univ. Paris 06, UMR 7617, F-75005, Paris, France, and Institut  
du Calcul et de la Simulation, UPMC Univ. Paris 06, F-75005, Paris, France*

E-mail: andres@chem.wayne.edu

---

\*To whom correspondence should be addressed

<sup>†</sup>Department of Chemistry, Wayne State University, Detroit, MI 48202

<sup>‡</sup>Laboratoire de Chimie Théorique, UPMC Univ. Paris 06, UMR 7617, F-75005, Paris, France

<sup>¶</sup>Institut du Calcul et de la Simulation, UPMC Univ. Paris 06, F-75005, Paris, France

# Contents

|          |                                                          |            |
|----------|----------------------------------------------------------|------------|
| <b>1</b> | <b>Notes</b>                                             | <b>S4</b>  |
| <b>2</b> | <b>Multipole accuracy</b>                                | <b>S4</b>  |
| <b>3</b> | <b>QM/MM binding energies</b>                            | <b>S5</b>  |
| <b>4</b> | <b>Solvation energies</b>                                | <b>S12</b> |
| <b>5</b> | <b>Comparison of optimizations to crystal structures</b> | <b>S14</b> |
| <b>6</b> | <b>Molecular structures</b>                              | <b>S16</b> |
| 6.1      | Water dimers . . . . .                                   | S16        |
| 6.2      | Water trimers . . . . .                                  | S20        |
| 6.3      | Water 21 . . . . .                                       | S21        |
| 6.4      | Peptide chains . . . . .                                 | S23        |
| <b>7</b> | <b>Full citations</b>                                    | <b>S36</b> |

# List of Figures

|    |                                                                                |     |
|----|--------------------------------------------------------------------------------|-----|
| S1 | Optimized DNA polymerase $\lambda$ reactant and product active sites . . . . . | S14 |
| S2 | Superposition of the QM/MM optimized reactant and the x-ray structure . .      | S15 |
| S3 | Superposition of the QM/MM optimized product and the x-ray structure . .       | S16 |

# List of Tables

|    |                                                                |    |
|----|----------------------------------------------------------------|----|
| S1 | Errors for point-charge multipoles . . . . .                   | S4 |
| S2 | Water dimer binding energies from PBE0/aug-cc-pVTZ . . . . .   | S5 |
| S3 | Water dimer binding energies from PBE0/6-311++G(d,p) . . . . . | S5 |

|     |                                                                 |     |
|-----|-----------------------------------------------------------------|-----|
| S4  | Water dimer binding energies from HF/aug-cc-pVTZ . . . . .      | S6  |
| S5  | Water dimer binding energies from HF/6-311++G(d,p) . . . . .    | S6  |
| S6  | Water dimer binding energies from PBE0/aug-cc-pVTZ . . . . .    | S7  |
| S7  | Water dimer binding energies from PBE0/6-311++G(d,p) . . . . .  | S7  |
| S8  | Water dimer binding energies from HF/aug-cc-pVTZ . . . . .      | S8  |
| S9  | Water dimer binding energies from HF/6-311++G(d,p) . . . . .    | S8  |
| S10 | Water trimer binding energies from PBE0/aug-cc-pVTZ . . . . .   | S8  |
| S11 | Water trimer binding energies from PBE0/6-311++G(d,p) . . . . . | S9  |
| S12 | Water trimer binding energies from HF/aug-cc-pVTZ . . . . .     | S9  |
| S13 | Water trimer binding energies from HF/6-311++G(d,p) . . . . .   | S9  |
| S14 | Water trimer binding energies from PBE0/aug-cc-pVTZ . . . . .   | S10 |
| S15 | Water trimer binding energies from PBE0/6-311++G(d,p) . . . . . | S10 |
| S16 | Water trimer binding energies from HF/aug-cc-pVTZ . . . . .     | S10 |
| S17 | Water trimer binding energies from HF/6-311++G(d,p) . . . . .   | S11 |
| S18 | Pure functional QM/MM solvation energies . . . . .              | S12 |
| S19 | Hybrid functional QM/MM solvation energies . . . . .            | S13 |
| S20 | Wavefunction and forcefield based solvation energies . . . . .  | S13 |

# 1 Notes

This SI document contains energies and geometries for the water clusters discussed in the main paper. Due to the large size of some of the files, Monte Carlo trajectories, optimization trajectories, and DNA polymerase structures are not included in the SI. Additional data can be requested by contacting the authors.

## 2 Multipole accuracy

Table S1 reports the percent errors of the point-charge representation of the multipole-multipole interactions for the ten water dimer structures. All errors are less than 1% of energies calculated with TINKER. The errors were calculated for both the 2003 and 2014 parameterizations of the AMOEBA model<sup>S1,S2</sup> and the results are similar. The largest error was found to be 0.028 kcal/mol for dimer number 3. It is clear from Table S1 and the results reported by Devereux et al.<sup>S3</sup> that the point-charge conversion is highly accurate.

Table S1: Water dimer multipole-multipole interaction errors introduced by the point-charge representation of the multipoles. All errors are less than 1% of the multipole-multipole interaction energies.

| Dimer | Error (%) |          |
|-------|-----------|----------|
|       | AMOEBA03  | AMOEBA14 |
| 1     | 0.04      | 0.51     |
| 2     | 0.23      | 0.54     |
| 3     | 0.34      | 0.57     |
| 4     | 0.19      | 0.27     |
| 5     | 0.14      | 0.32     |
| 6     | 0.06      | 0.33     |
| 7     | 0.01      | 0.28     |
| 8     | 0.23      | 0.19     |
| 9     | 0.08      | 0.22     |
| 10    | 0.02      | 0.22     |

### 3 QM/MM binding energies

Tables S2–S17 list the QM/MM dimer and trimer binding energies calculated at several different levels of theory. Values are given for every possible division of the cluster into QM and MM regions. The values are an average of two QM/MM permutations where the identities of the QM and MM regions are swapped.

Table S2: Water dimer binding energies from PBE0/aug-cc-pVTZ (BSSE corrected) and PBE0/aug-cc-pVTZ/AMOEBA.

| Dimer | $E_{bind}$ (eV) |         |
|-------|-----------------|---------|
|       | QM              | QM/MM   |
| 1     | -0.2109         | -0.1934 |
| 2     | -0.1857         | -0.1720 |
| 3     | -0.1833         | -0.1705 |
| 4     | -0.1652         | -0.1338 |
| 5     | -0.1505         | -0.1076 |
| 6     | -0.1467         | -0.0993 |
| 7     | -0.1219         | -0.1110 |
| 8     | -0.0480         | -0.0503 |
| 9     | -0.1145         | -0.1092 |
| 10    | -0.0802         | -0.0862 |

Table S3: Water dimer binding energies from PBE0/6-311++G(d,p) (BSSE corrected) and PBE0/6-311++G(d,p)/AMOEBA.

| Dimer | $E_{bind}$ (eV) |         |
|-------|-----------------|---------|
|       | QM              | QM/MM   |
| 1     | -0.2355         | -0.2197 |
| 2     | -0.2111         | -0.1972 |
| 3     | -0.2117         | -0.1962 |
| 4     | -0.1981         | -0.1534 |
| 5     | -0.1821         | -0.1265 |
| 6     | -0.1789         | -0.1187 |
| 7     | -0.1460         | -0.1281 |
| 8     | -0.0541         | -0.0579 |
| 9     | -0.1530         | -0.1332 |
| 10    | -0.1122         | -0.1041 |

Table S4: Water dimer binding energies from HF/aug-cc-pVTZ (BSSE corrected) and HF/aug-cc-pVTZ/AMOEBA.

| Dimer | $E_{bind}$ (eV) |         |
|-------|-----------------|---------|
|       | QM              | QM/MM   |
| 1     | -0.1548         | -0.2088 |
| 2     | -0.1389         | -0.1867 |
| 3     | -0.1397         | -0.1854 |
| 4     | -0.1156         | -0.1453 |
| 5     | -0.1080         | -0.1188 |
| 6     | -0.1081         | -0.1106 |
| 7     | -0.0879         | -0.1179 |
| 8     | -0.0290         | -0.0529 |
| 9     | -0.0836         | -0.1180 |
| 10    | -0.0630         | -0.0932 |

Table S5: Water dimer binding energies from HF/6-311++G(d,p) (BSSE corrected) and HF/6-311++G(d,p)/AMOEBA.

| Dimer | $E_{bind}$ (eV) |         |
|-------|-----------------|---------|
|       | QM              | QM/MM   |
| 1     | -0.1782         | -0.2309 |
| 2     | -0.1629         | -0.2081 |
| 3     | -0.1665         | -0.2075 |
| 4     | -0.1457         | -0.1614 |
| 5     | -0.1374         | -0.1349 |
| 6     | -0.1390         | -0.1275 |
| 7     | -0.1108         | -0.1320 |
| 8     | -0.0358         | -0.0591 |
| 9     | -0.1183         | -0.1383 |
| 10    | -0.0929         | -0.1087 |

Table S6: Water dimer binding energies from PBE0/aug-cc-pVTZ (BSSE corrected) and PBE0/aug-cc-pVTZ/TIP3P.

| Dimer | $E_{bind}$ (eV) |         |
|-------|-----------------|---------|
|       | QM              | QM/MM   |
| 1     | -0.2109         | -0.2597 |
| 2     | -0.1857         | -0.2414 |
| 3     | -0.1833         | -0.2442 |
| 4     | -0.1652         | -0.1776 |
| 5     | -0.1505         | -0.1592 |
| 6     | -0.1467         | -0.1549 |
| 7     | -0.1219         | -0.1390 |
| 8     | -0.0480         | -0.0619 |
| 9     | -0.1145         | -0.1647 |
| 10    | -0.0802         | -0.1333 |

Table S7: Water dimer binding energies from PBE0/6-311++G(d,p) (BSSE corrected) and PBE0/6-311++G(d,p)/TIP3P.

| Dimer | $E_{bind}$ (eV) |         |
|-------|-----------------|---------|
|       | QM              | QM/MM   |
| 1     | -0.2355         | -0.2828 |
| 2     | -0.2111         | -0.2607 |
| 3     | -0.2117         | -0.2649 |
| 4     | -0.1981         | -0.1954 |
| 5     | -0.1821         | -0.1741 |
| 6     | -0.1789         | -0.1707 |
| 7     | -0.1460         | -0.1588 |
| 8     | -0.0541         | -0.0662 |
| 9     | -0.1530         | -0.1928 |
| 10    | -0.1122         | -0.1558 |

Table S8: Water dimer binding energies from HF/aug-cc-pVTZ (BSSE corrected) and HF/aug-cc-pVTZ/TIP3P.

| Dimer | $E_{bind}$ (eV) |         |
|-------|-----------------|---------|
|       | QM              | QM/MM   |
| 1     | -0.1548         | -0.2737 |
| 2     | -0.1389         | -0.2533 |
| 3     | -0.1397         | -0.2568 |
| 4     | -0.1156         | -0.1874 |
| 5     | -0.1080         | -0.1669 |
| 6     | -0.1081         | -0.1630 |
| 7     | -0.0879         | -0.1468 |
| 8     | -0.0290         | -0.0637 |
| 9     | -0.0836         | -0.1746 |
| 10    | -0.0630         | -0.1418 |

Table S9: Water dimer binding energies from HF/6-311++G(d,p) (BSSE corrected) and HF/6-311++G(d,p)/TIP3P.

| Dimer | $E_{bind}$ (eV) |         |
|-------|-----------------|---------|
|       | QM              | QM/MM   |
| 1     | -0.1782         | -0.2929 |
| 2     | -0.1629         | -0.2695 |
| 3     | -0.1665         | -0.2743 |
| 4     | -0.1457         | -0.2021 |
| 5     | -0.1374         | -0.1792 |
| 6     | -0.1390         | -0.1764 |
| 7     | -0.1108         | -0.1633 |
| 8     | -0.0358         | -0.0670 |
| 9     | -0.1183         | -0.1984 |
| 10    | -0.0929         | -0.1610 |

Table S10: Water trimer binding energies from PBE0/aug-cc-pVTZ (BSSE corrected) and PBE0/aug-cc-pVTZ/AMOEBA.

| Trimer | $E_{bind}$ (eV) |         |
|--------|-----------------|---------|
|        | QM              | QM/MM   |
| uud 1  | -0.4670         | -0.3924 |
| uud 2  | -0.4642         | -0.3961 |
| uud 3  | -0.4834         | -0.4073 |
| uuu 1  | -0.4512         | -0.3702 |
| uuu 2  | -0.4512         | -0.3707 |
| uuu 3  | -0.4512         | -0.3707 |



Table S11: Water trimer binding energies from PBE0/6-311++G(d,p) (BSSE corrected) and PBE0/6-311++G(d,p)/AMOEBA.

| Trimer | $E_{bind}$ (eV) |         |
|--------|-----------------|---------|
|        | QM              | QM/MM   |
| uud 1  | -0.4977         | -0.4324 |
| uud 2  | -0.4942         | -0.4363 |
| uud 3  | -0.5218         | -0.4514 |
| uuu 1  | -0.4859         | -0.4124 |
| uuu 2  | -0.4859         | -0.4128 |
| uuu 3  | -0.4859         | -0.4129 |

Table S12: Water trimer binding energies from HF/aug-cc-pVTZ (BSSE corrected) and HF/aug-cc-pVTZ/AMOEBA.

| Trimer | $E_{bind}$ (eV) |         |
|--------|-----------------|---------|
|        | QM              | QM/MM   |
| uud 1  | -0.3246         | -0.4202 |
| uud 2  | -0.3208         | -0.4235 |
| uud 3  | -0.3493         | -0.4351 |
| uuu 1  | -0.3227         | -0.3979 |
| uuu 2  | -0.3227         | -0.3983 |
| uuu 3  | -0.3227         | -0.3983 |

Table S13: Water trimer binding energies from HF/6-311++G(d,p) (BSSE corrected) and HF/6-311++G(d,p)/AMOEBA.

| Trimer | $E_{bind}$ (eV) |         |
|--------|-----------------|---------|
|        | QM              | QM/MM   |
| uud 1  | -0.3521         | -0.4533 |
| uud 2  | -0.3478         | -0.4566 |
| uud 3  | -0.3850         | -0.4717 |
| uuu 1  | -0.3540         | -0.4333 |
| uuu 2  | -0.3540         | -0.4337 |
| uuu 3  | -0.3540         | -0.4338 |

Table S14: Water trimer binding energies from PBE0/aug-cc-pVTZ (BSSE corrected) and PBE0/aug-cc-pVTZ/TIP3P.

| Trimer | $E_{bind}$ (eV) |         |
|--------|-----------------|---------|
|        | QM              | QM/MM   |
| uud 1  | -0.4670         | -0.4742 |
| uud 2  | -0.4642         | -0.4724 |
| uud 2  | -0.4834         | -0.4932 |
| uuu 1  | -0.4512         | -0.4626 |
| uuu 2  | -0.4512         | -0.4626 |
| uuu 3  | -0.4512         | -0.4626 |

Table S15: Water trimer binding energies from PBE0/6-311++G(d,p) (BSSE corrected) and PBE0/6-311++G(d,p)/TIP3P.

| Trimer | $E_{bind}$ (eV) |         |
|--------|-----------------|---------|
|        | QM              | QM/MM   |
| uud 1  | -0.4977         | -0.4972 |
| uud 2  | -0.4942         | -0.4961 |
| uud 2  | -0.5218         | -0.5249 |
| uuu 1  | -0.4859         | -0.4847 |
| uuu 2  | -0.4859         | -0.4847 |
| uuu 3  | -0.4859         | -0.4847 |

Table S16: Water trimer binding energies from HF/aug-cc-pVTZ (BSSE corrected) and HF/aug-cc-pVTZ/TIP3P.

| Trimer | $E_{bind}$ (eV) |         |
|--------|-----------------|---------|
|        | QM              | QM/MM   |
| uud 1  | -0.3246         | -0.4936 |
| uud 2  | -0.3208         | -0.4917 |
| uud 2  | -0.3493         | -0.5156 |
| uuu 1  | -0.3227         | -0.4795 |
| uuu 2  | -0.3227         | -0.4795 |
| uuu 3  | -0.3227         | -0.4795 |

Table S17: Water trimer binding energies from HF/6-311++G(d,p) (BSSE corrected) and HF/6-311++G(d,p)/TIP3P.

| Trimer | $E_{bind}$ (eV) |         |
|--------|-----------------|---------|
|        | QM              | QM/MM   |
| uud 1  | -0.3521         | -0.5116 |
| uud 2  | -0.3478         | -0.5102 |
| uud 2  | -0.3850         | -0.5412 |
| uuu 1  | -0.3540         | -0.4967 |
| uuu 2  | -0.3540         | -0.4967 |
| uuu 3  | -0.3540         | -0.4967 |

## 4 Solvation energies

Table S18: Pure functional QM/MM solvation energies for the  $(\text{H}_2\text{O})_5(\text{H}_2\text{O})_{16} \rightarrow (\text{H}_2\text{O})+(\text{H}_2\text{O})_4(\text{H}_2\text{O})_{16}$  system.

| QM   | basis         | MM                  | $E_{solv}$ (eV) |
|------|---------------|---------------------|-----------------|
| B97D | 6-311++G(d,p) | –                   | -1.5239         |
| B97D | 6-311++G(d,p) | AMOEBA              | -1.4663         |
| B97D | 6-311++G(d,p) | AMOEBA <sup>†</sup> | -1.2387         |
| B97D | 6-311++G(d,p) | TIP3P               | -1.2817         |
| BLYP | 6-311++G(d,p) | –                   | -1.2731         |
| BLYP | 6-311++G(d,p) | AMOEBA              | -1.3897         |
| BLYP | 6-311++G(d,p) | AMOEBA <sup>†</sup> | -1.1589         |
| BLYP | 6-311++G(d,p) | TIP3P               | -1.2015         |
| PBE  | 6-311++G(d,p) | –                   | -1.4939         |
| PBE  | 6-311++G(d,p) | AMOEBA              | -1.5733         |
| PBE  | 6-311++G(d,p) | AMOEBA <sup>†</sup> | -1.3465         |
| PBE  | 6-311++G(d,p) | TIP3P               | -1.3902         |

<sup>†</sup> Without MM polarization

QM, MM, and QM/MM solvation energies are reported in Tables S18–S20. The tables are subdivided into *ab initio*, pure functionals, hybrid functionals, and force fields. The strong influence of the polarization energy can be seen in Table S20, where the AMOEBA solvation energy without polarization is significantly reduced.

Table S19: Hybrid functional QM/MM solvation energies for the  $(\text{H}_2\text{O})_5(\text{H}_2\text{O})_{16} \rightarrow (\text{H}_2\text{O})+(\text{H}_2\text{O})_4(\text{H}_2\text{O})_{16}$  system.

| QM             | basis         | MM                  | $E_{solv}$ (eV) |
|----------------|---------------|---------------------|-----------------|
| $\omega$ B97xD | 6-311++G(d,p) | –                   | -1.6659         |
| $\omega$ B97xD | 6-311++G(d,p) | AMOEBA              | -1.5909         |
| $\omega$ B97xD | 6-311++G(d,p) | AMOEBA <sup>†</sup> | -1.3697         |
| $\omega$ B97xD | 6-311++G(d,p) | TIP3P               | -1.4124         |
| B3LYP          | 6-311++G(d,p) | –                   | -1.3901         |
| B3LYP          | 6-311++G(d,p) | AMOEBA              | -1.4835         |
| B3LYP          | 6-311++G(d,p) | AMOEBA <sup>†</sup> | -1.2560         |
| B3LYP          | 6-311++G(d,p) | TIP3P               | -1.2977         |
| PBE0           | 6-311++G(d,p) | –                   | -1.5156         |
| PBE0           | 6-311++G(d,p) | AMOEBA              | -1.5814         |
| PBE0           | 6-311++G(d,p) | AMOEBA <sup>†</sup> | -1.3575         |
| PBE0           | 6-311++G(d,p) | TIP3P               | -1.3999         |
| PBE0-D2        | 6-311++G(d,p) | –                   | -1.7037         |
| PBE0-D2        | 6-311++G(d,p) | AMOEBA              | -1.6681         |
| PBE0-D2        | 6-311++G(d,p) | TIP3P               | -1.5073         |

<sup>†</sup> Without MM polarization

Table S20: Wavefunction and forcefield based solvation energies for the  $(\text{H}_2\text{O})_5(\text{H}_2\text{O})_{16} \rightarrow (\text{H}_2\text{O})+(\text{H}_2\text{O})_4(\text{H}_2\text{O})_{16}$  system.

| QM  | basis         | MM                  | $E_{solv}$ (eV) |
|-----|---------------|---------------------|-----------------|
| HF  | 6-31G(d)      | –                   | -1.5025         |
| HF  | 6-31G(d)      | AMOEBA              | -1.4858         |
| HF  | 6-31G(d)      | TIP3P               | -1.2831         |
| MP2 | 6-311++G(d,p) | –                   | -1.5730         |
| –   | –             | AMOEBA              | -1.5419         |
| –   | –             | iAMOEBA             | -1.4424         |
| –   | –             | AMOEBA <sup>†</sup> | -0.5091         |
| –   | –             | TIP3P               | -1.1948         |

<sup>†</sup> Without MM polarization

## 5 Comparison of optimizations to crystal structures

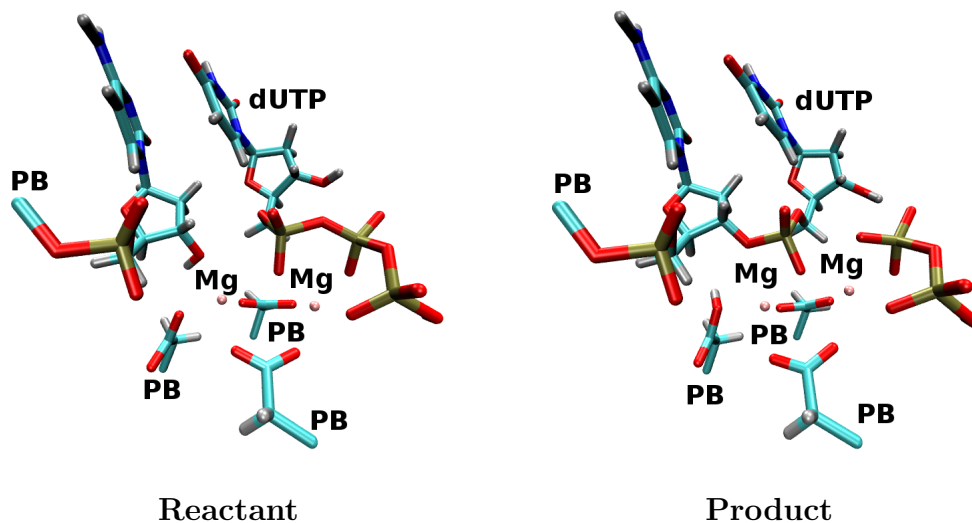

Figure S1: Optimized reactant and product active sites of DNA polymerase  $\lambda$ . For clarity, only the QM and PB were displayed and the QM water molecules have been removed.

Non-polarizable QM/MM geometry optimizations were also performed on the reactant and product structures of a nucleotide addition reaction catalyzed by a DNA polymerase enzyme. The enzyme chosen for these simulations was human DNA polymerase  $\lambda$  with a dUTP added to the nascent DNA chain.<sup>S4,S5</sup> The geometry optimizations were performed at the  $\omega$ B97xD/6-31++G(d,p)/AMBER99 level of theory. In order to make the calculations tractable, four pseudo-bonds need to bridge the QM and MM subsystems. The QM/MM system contains 101 QM atoms, 4 pseudo-bonds, 18 boundary atoms, and 18403 MM atoms. Three of the pseudo-bonds have been placed on the aspartate residues in the active site and the final pseudo-bond is on the DNA backbone (see Figure S1).

The geometry of the reactant was obtained from QM/MM simulations reported previously,<sup>S4-S6</sup> and the product structure was constructed by physically moving the hydrogen, phosphorous, and oxygen atoms to break the chemical bonds. The modified coordinates were specifically chosen to be far from ideal bond lengths and angles, which provides a more difficult test of the optimization algorithms. The potential energies for the optimized reactant and product structures and the root mean square deviation (RMSD) are in agreement with

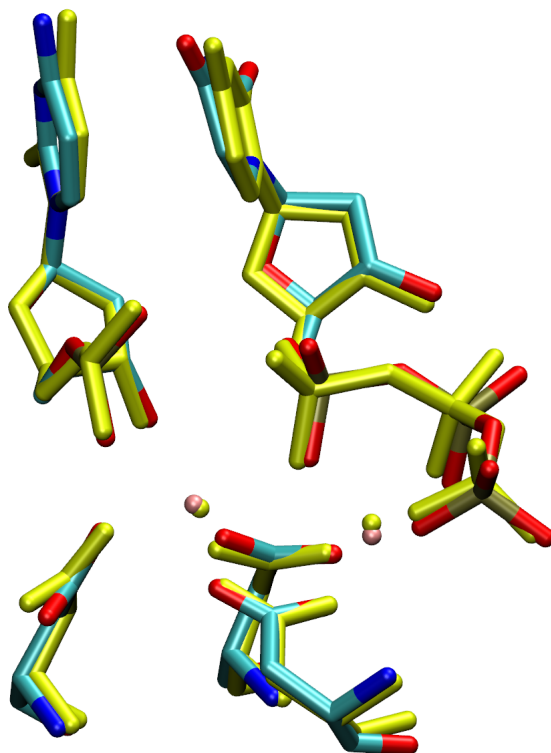

Figure S2: Superposition of the QM/MM optimized reactant and the x-ray crystal structure (PDB:2PFO, yellow). The RMSD was calculated to be 0.31 Å.

our previous results<sup>S4,S5</sup> and the crystals structures.<sup>S6</sup> RMSD between the active sites of the optimized structures and the crystal structures for the product and reactant were determined to be 0.31 and 0.42 Å, respectively. Figures S2 and S3 show the overlap between the QM/MM and x-ray structures<sup>S6</sup> for the reactant and product, respectively. The crystal structure is shown in yellow.

Recent studies of the highly related DNA polymerase  $\beta$  suggest that a third magnesium ion may be involved in the reaction mechanism.<sup>S7</sup> We have carried out QM/MM optimizations with a third magnesium ion located near the dUTP alpha phosphorous, as found in the experimental studies. Our preliminary results suggest that both the third ion and the entropic contribution have strong effects on the relative energies of the reactant and product. Additionally, the pseudo-bond method can readily be extended to multipolar/polarizable force fields to allow for polarizable enzymatic reactions. These three factors will be explored further in the future as they are beyond the scope of the present work.

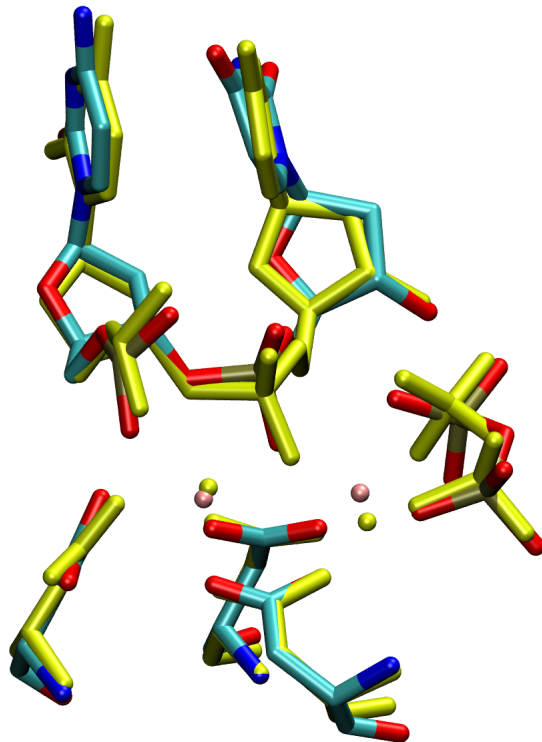

Figure S3: Superposition of the QM/MM optimized reactant and the x-ray crystal structure (PDB:2PFQ, yellow). The RMSD was calculated to be 0.42 Å.

## 6 Molecular structures

XYZ files for the water clusters and peptides are given below. The structures are labeled in the comment line of the XYZ file.

### 6.1 Water dimers

6

Dimer1

O 0.872736 0.000000 -1.246754

H 0.288273 0.000000 -2.010853

H 0.288273 0.000000 -0.482655

O -0.778803 0.000000 1.132683

H -0.666682 0.764099 1.706291



H -0.666682 -0.764099 1.706290

-----

6

Dimer2

O 0.83717100 -0.11036500 -1.28937600

H 0.25270831 -0.11036500 -2.05347506

H 0.25270783 -0.11036500 -0.52527732

O -0.67496100 0.05571300 1.19601400

H -1.59808346 0.08932533 1.46463854

H -0.20106721 0.56727951 1.85871180

-----

6

Dimer3

O 0.81155400 0.00000000 -1.31392300

H 0.22709107 0.00000000 -2.07802187

H 0.22709107 0.00000000 -0.54982413

O -0.66377500 0.00000000 1.20081300

H -0.07883416 0.00000000 1.96454608

H -1.55399554 0.00000000 1.56543801

-----

6

Dimer4

O -0.09543100 -0.65652700 -1.21555100

H -0.67989369 -0.65652700 -1.97965006

H -0.67989417 -0.65652700 -0.45145232

O 0.09543100 0.65652700 1.21555100

H 0.67989417 0.65652700 0.45145232

H 0.67989369 0.65652700 1.97965006

-----

6

Dimer5

O -0.27044000 0.36263800 -1.29694700

H -0.85490317 0.36263800 -2.06104568

H -0.85490269 0.36263800 -0.53284794

O 0.29425600 -0.29295500 1.30953900

H 0.68054422 -0.87736854 1.96884638

H 0.83930439 -0.40368190 0.52461492

-----

6

Dimer6

O -0.340410 0.000000 -1.324577

H -0.924873 0.000000 -2.088676

H -0.924873 0.000000 -0.560478

O 0.340409 0.000000 1.324577

H 0.924872 0.000000 0.560478

H 0.924873 0.000000 2.088676

-----

6

Dimer7

O -0.624294 0.000000 1.212401

H -1.208757 0.000000 0.448302

H -1.208757 0.000000 1.976500

O 0.712130 0.000000 -1.325109

H 0.854910 -0.764099 -0.758355

H 0.854909 0.764099 -0.758355

-----

6

Dimer8

O 1.05351300 1.32267600 0.00000000

H 0.46905007 1.32267600 -0.76409887

H 0.46905007 1.32267600 0.76409887

O -1.05351300 -1.32267500 0.00000000

H -0.46905007 -1.32267500 -0.76409887

H -0.46905007 -1.32267500 0.76409887

-----

6

Dimer9

O 1.575290 0.000000 0.000000

H 0.990827 0.000000 -0.764099

H 0.990827 0.000000 0.764099

O -1.342829 0.000000 0.000000

H -1.927292 0.764099 0.000000

H -1.927292 -0.764099 0.000000

-----

6

Dimer10

O -1.43512200 0.00000000 0.00000000

H -2.01958493 0.00000000 -0.76409887

H -2.01958493 0.00000000 0.76409887

O 1.66947500 0.00000000 0.00000000

H 1.08501207 0.00000000 -0.76409887

H 1.08501207 0.00000000 0.76409887

## 6.2 Water trimers

9

uud

O 7.97080000 -1.97570000 -0.12000000

H 8.88262950 -2.25702115 -0.19521451

H 7.52075183 -2.56327557 0.48699541

O 10.76520000 -1.96030000 -0.26440000

H 10.56756541 -1.03037952 -0.15295358

H 11.28017964 -2.25357096 0.48727809

O 9.37150000 0.42000000 0.26880000

H 8.65154989 -0.20781890 0.20758636

H 9.16674089 1.17205281 -0.28682768

-----

9

uuu

O 17.44550000 -2.33970000 -0.14840000

H 16.82154031 -2.82261716 0.39353834

H 17.36012888 -1.40679668 0.04815788

O 18.12910000 0.34930000 0.22760000

H 18.12218955 1.01036148 0.91982959

H 18.99800570 -0.05120353 0.19876181

O 20.13750000 -1.57100000 -0.11600000

H 20.82083176 -2.00645800 0.39357421

H 19.35893063 -2.12782693 -0.11831211

### 6.3 Water 21

63

water21

O 11.717236 11.442052 11.798908

H 11.663986 10.558790 11.388620

H 11.433550 11.254508 12.711759

O 11.556608 15.680353 10.163047

H 10.959448 16.381017 9.895684

H 11.747781 15.838217 11.102115

O 12.071718 16.029951 12.932211

H 12.057426 16.918369 13.293295

H 11.471112 15.521790 13.512439

O 14.551422 14.674614 12.990496

H 13.749539 15.221256 12.964140

H 15.292821 15.280029 12.942212

O 14.009871 12.698504 10.998106

H 14.308390 13.326458 11.669987

H 13.232319 12.261238 11.397368

O 13.117598 13.692896 8.614162

H 12.610342 14.452298 8.921342

H 13.514149 13.337186 9.430788

O 12.050292 11.602501 7.306247

H 12.437630 12.392054 7.741134

H 12.145080 11.779123 6.369275

O 14.233048 12.204958 14.556678

H 14.429301 13.041721 14.120924

H 13.390670 12.336735 15.009491

O 12.078478 8.400424 13.468224  
H 11.834504 8.337852 12.534835  
H 12.982857 8.771187 13.454590  
O 11.350862 8.947993 10.720683  
H 11.875032 8.957137 9.903738  
H 10.424042 9.059488 10.445735  
O 14.520367 9.610120 13.322492  
H 14.497033 10.501010 13.703948  
H 14.767488 9.731219 12.390959  
O 15.068872 10.105904 10.578629  
H 14.872835 11.052862 10.623227  
H 14.461064 9.749754 9.920921  
O 13.063050 9.319358 8.514941  
H 12.733999 10.097248 8.029352  
H 13.303528 8.677440 7.845468  
O 8.432488 13.426143 12.719068  
H 8.925985 13.435731 11.882429  
H 9.053507 13.750191 13.379419  
O 10.123495 13.250763 10.524855  
H 10.652136 14.039692 10.338542  
H 10.737457 12.631255 10.968508  
O 10.438768 14.619238 14.623332  
H 9.887918 15.030147 15.292131  
H 10.868168 13.871440 15.085140  
O 9.392390 11.578962 8.446636  
H 10.244737 11.478120 8.001613  
H 9.557278 12.257497 9.124136

O 11.612102 12.468569 15.792305  
H 11.575865 12.164343 16.700203  
H 11.257336 11.715078 15.268816  
O 8.359077 10.635670 12.853569  
H 8.249669 11.600675 12.786072  
H 8.443935 10.318509 11.943649  
O 8.706113 9.595119 10.122786  
H 8.865776 10.280085 9.439825  
H 8.017835 9.035713 9.761018  
O 10.712986 10.570243 14.186420  
H 11.155521 9.710204 14.001269  
H 9.832780 10.481290 13.763070

## 6.4 Peptide chains

112

DA (amoebapro13)

N -17.186828 12.539282 0.174611  
C -15.739069 12.605858 0.295206  
C -15.231016 12.546995 1.738922  
O -14.175244 11.969315 1.986251  
H -17.629107 13.308568 -0.346484  
H -15.316441 11.693442 -0.194410  
C -15.164199 13.858760 -0.407318  
H -15.411174 13.875347 -1.493000  
H -15.534497 14.807746 0.042688  
H -14.052571 13.873188 -0.330769  
N -15.997192 13.122420 2.702705

C -15.683746 13.062711 4.121737  
C -15.723172 11.637687 4.683664  
O -14.900629 11.292552 5.528971  
H -16.840285 13.653257 2.449405  
H -14.626381 13.400353 4.258681  
C -16.617327 13.975903 4.951797  
H -16.541092 15.041138 4.636925  
H -17.685707 13.670383 4.877759  
H -16.341015 13.937626 6.030531  
N -16.670070 10.796868 4.194044  
C -16.776319 9.393685 4.558008  
C -15.609705 8.570690 4.006420  
O -15.114021 7.677604 4.690141  
H -17.294504 11.094205 3.434206  
H -16.699111 9.311176 5.670084  
C -18.119810 8.781059 4.096567  
H -18.990846 9.302257 4.553268  
H -18.235938 8.827042 2.989055  
H -18.186002 7.709370 4.392127  
N -15.130734 8.910162 2.781702  
C -13.935717 8.329234 2.190320  
C -12.684359 8.618133 3.026392  
O -11.852795 7.732729 3.217132  
H -15.636495 9.593809 2.202348  
H -14.048017 7.217085 2.197321  
C -13.720989 8.811855 0.735027  
H -14.593088 8.571976 0.085874



H -13.547202 9.911509 0.689156  
H -12.828663 8.319627 0.286304  
N -12.573055 9.861866 3.559431  
C -11.514694 10.277737 4.464151  
C -11.523641 9.482989 5.772345  
O -10.462322 9.114384 6.271402  
H -13.243112 10.593798 3.291454  
H -10.533608 10.045535 3.981669  
C -11.585417 11.794026 4.771134  
H -11.535257 12.406419 3.842634  
H -12.525646 12.059010 5.307558  
H -10.736295 12.103944 5.421291  
N -12.733682 9.189378 6.312597  
C -12.925444 8.352861 7.485520  
C -12.424976 6.922207 7.269405  
O -11.812744 6.347897 8.166609  
H -13.586063 9.607275 5.917782  
H -12.295736 8.765134 8.311856  
C -14.405724 8.326990 7.939243  
H -14.788991 9.349162 8.157494  
H -15.061466 7.871551 7.161769  
H -14.522485 7.721573 8.866267  
N -12.657118 6.355214 6.057937  
C -12.154713 5.050734 5.657750  
C -10.625187 5.003559 5.623675  
O -10.033205 4.014505 6.047890  
H -13.241497 6.841846 5.365881

H -12.454062 4.308264 6.437765  
C -12.724395 4.606481 4.287967  
H -13.836536 4.559388 4.300026  
H -12.418698 5.304336 3.474522  
H -12.349765 3.594025 4.015569  
N -9.978964 6.101153 5.154262  
C -8.534345 6.264449 5.177113  
C -7.971281 6.268003 6.602193  
O -6.925258 5.672229 6.846801  
H -10.513353 6.871366 4.730966  
H -8.075195 5.373290 4.683203  
C -8.087137 7.546139 4.430797  
H -8.423796 7.544517 3.369636  
H -8.493865 8.461490 4.919550  
H -6.977497 7.634605 4.431268  
N -8.689655 6.919755 7.552183  
C -8.362817 6.946167 8.969618  
C -8.464839 5.575207 9.649145  
O -7.742909 5.315498 10.607384  
H -9.519315 7.462474 7.279954  
H -7.290792 7.243772 9.074696  
C -9.253170 7.958310 9.735388  
H -9.174004 8.985013 9.312454  
H -10.324468 7.651994 9.703866  
H -8.954060 8.009214 10.806406  
N -9.374864 4.697507 9.155247  
C -9.532500 3.322042 9.600404

C -8.394917 2.388187 9.164694  
O -8.230017 1.316367 9.747014  
H -10.038572 5.000183 8.431411  
H -9.509669 3.308365 10.718051  
C -10.881696 2.733539 9.109792  
H -11.748452 3.341952 9.453383  
H -10.913934 2.682936 7.996696  
H -11.019427 1.698378 9.494750  
N -7.609813 2.779138 8.129692  
H -7.792431 3.653000 7.619952  
C -6.478387 2.041658 7.623057  
H -6.236920 1.165977 8.264413  
H -6.676607 1.666023 6.595642  
H -5.576170 2.690518 7.579949  
C -17.945574 11.524273 0.660900  
O -17.468190 10.581082 1.291378  
C -19.442566 11.617485 0.435039  
H -19.972145 11.678446 1.411201  
H -19.749856 12.492363 -0.178930  
H -19.797593 10.699524 -0.083739

-----

230

DP (amoebapro13)

N -0.006385 -0.034198 -0.162896  
C 1.446625 0.025672 -0.137400  
C 2.041966 0.063089 1.272625  
O 3.100626 -0.517307 1.500838

H -0.474757 0.698323 -0.713135  
H 1.833153 -0.922650 -0.586944  
C 1.982289 1.222986 -0.958471  
H 1.663290 1.172396 -2.024175  
H 1.648519 2.202582 -0.547029  
H 3.096596 1.230747 -0.956060  
N 1.349443 0.728884 2.233085  
C 1.758152 0.763307 3.627092  
C 1.729064 -0.619511 4.284676  
O 2.631856 -0.951527 5.050083  
H 0.502296 1.261613 1.998327  
H 2.835022 1.062191 3.659297  
C 0.921171 1.787597 4.445555  
C 1.315451 1.783042 5.917200  
C 0.595037 1.179832 6.953412  
C 2.506617 2.216011 6.464674  
N 1.352640 1.277894 8.093223  
C 2.523487 1.907846 7.807396  
C 3.597050 2.835808 5.849573  
C 3.595129 2.197666 8.641779  
C 4.710184 3.141276 6.664340  
C 4.706415 2.830645 8.046576  
H 1.061253 2.817951 4.045928  
H -0.167204 1.560676 4.369477  
H -0.387854 0.681949 6.930919  
H 1.080540 0.914432 9.018759  
H 3.604249 3.081191 4.771171

H 3.589654 1.935490 9.716532  
H 5.600142 3.623134 6.216754  
H 5.592475 3.075094 8.663129  
N 0.709453 -1.453840 3.957574  
C 0.613773 -2.819788 4.444102  
C 1.716538 -3.713083 3.866236  
O 2.247665 -4.569257 4.571619  
H 0.018885 -1.196198 3.241904  
H 0.806657 -2.804150 5.544773  
C -0.793875 -3.425123 4.186266  
C -0.902435 -4.836293 4.748888  
C -0.771801 -6.022273 4.019583  
C -0.997590 -5.198179 6.077831  
N -0.809624 -7.061633 4.914685  
C -0.949437 -6.571411 6.175584  
C -1.096063 -4.392914 7.215159  
C -1.016214 -7.250580 7.385108  
C -1.168332 -5.046586 8.465753  
C -1.134397 -6.460729 8.548181  
H -1.584868 -2.796720 4.655022  
H -1.014116 -3.447898 3.093694  
H -0.639062 -6.170902 2.935834  
H -0.730245 -8.059282 4.667317  
H -1.120570 -3.288986 7.152436  
H -0.969516 -8.354442 7.441752  
H -1.241443 -4.448409 9.393737  
H -1.180067 -6.950935 9.539536

N 2.129227 -3.463146 2.597086  
C 3.288685 -4.101992 1.995088  
C 4.572915 -3.807354 2.779715  
O 5.375335 -4.712278 3.003845  
H 1.600290 -2.815671 1.997495  
H 3.148596 -5.209039 2.062941  
C 3.467963 -3.705374 0.509881  
H 2.570801 -3.959790 -0.098014  
H 3.663742 -2.614292 0.398127  
H 4.334797 -4.242384 0.062556  
N 4.748412 -2.539428 3.233919  
C 5.847186 -2.121187 4.089519  
C 5.812298 -2.799096 5.463423  
O 6.856923 -3.190069 5.981958  
H 4.092289 -1.797809 2.957766  
H 6.797786 -2.473186 3.618803  
C 5.901952 -0.577220 4.249362  
C 7.028087 -0.130094 5.159377  
C 8.361218 -0.167013 4.712186  
C 6.774707 0.245741 6.490946  
C 9.412967 0.158559 5.575091  
C 7.826394 0.575268 7.352142  
C 9.146694 0.532082 6.895353  
H 6.027618 -0.082393 3.258814  
H 4.937772 -0.200814 4.666614  
H 8.597901 -0.485470 3.683657  
H 5.744079 0.256143 6.881524

H 10.453482 0.104220 5.217345  
H 7.614210 0.853309 8.396469  
H 9.975743 0.777936 7.577249  
N 4.600138 -2.997138 6.036968  
C 4.391283 -3.752497 7.260635  
C 4.915602 -5.184820 7.130265  
O 5.595244 -5.674709 8.031284  
H 3.762820 -2.569190 5.624388  
H 5.011996 -3.286233 8.064799  
C 2.899297 -3.751958 7.696466  
C 2.647586 -4.577379 8.941274  
C 2.898456 -4.045483 10.216390  
C 2.214598 -5.911481 8.843961  
C 2.720170 -4.823188 11.364685  
C 2.032173 -6.688762 9.991496  
C 2.281878 -6.149126 11.257209  
O 2.098934 -6.932567 12.354020  
H 2.264759 -4.165656 6.877381  
H 2.540722 -2.711501 7.870860  
H 3.261924 -3.010382 10.325217  
H 2.025306 -6.367658 7.858420  
H 2.933784 -4.386142 12.353384  
H 1.700733 -7.734964 9.893740  
H 2.371028 -6.509185 13.155655  
N 4.625317 -5.849548 5.983174  
C 5.106759 -7.182886 5.670926  
C 6.628350 -7.244167 5.499137

O 7.246566 -8.232103 5.889238  
H 4.015231 -5.416358 5.278174  
H 4.893011 -7.829535 6.556746  
C 4.393548 -7.775713 4.425659  
C 4.797849 -9.213607 4.168543  
C 4.365235 -10.230645 5.037573  
C 5.669506 -9.554230 3.120054  
C 4.798473 -11.548905 4.871173  
C 6.096197 -10.874954 2.947186  
C 5.662067 -11.878683 3.819630  
O 6.101481 -13.151865 3.630222  
H 4.623471 -7.155198 3.527222  
H 3.286727 -7.740312 4.553344  
H 3.705823 -9.994765 5.889366  
H 6.054137 -8.778625 2.437896  
H 4.462087 -12.321026 5.581697  
H 6.794929 -11.120914 2.131458  
H 5.822632 -13.740334 4.317051  
N 7.253154 -6.165380 4.967172  
C 8.698835 -6.003299 4.914075  
C 9.320777 -6.006922 6.314926  
O 10.325575 -6.678134 6.542687  
H 6.700255 -5.415529 4.533379  
H 9.132479 -6.900290 4.407064  
C 9.100642 -4.724873 4.127786  
C 10.580294 -4.409356 4.185178  
C 11.494213 -5.113841 3.382441



C 11.073037 -3.439096 5.077916  
C 12.866931 -4.860263 3.475399  
C 12.445561 -3.186309 5.169856  
C 13.343909 -3.895651 4.367665  
H 8.789786 -4.811411 3.061192  
H 8.553070 -3.844409 4.537549  
H 11.141381 -5.894414 2.688764  
H 10.383659 -2.885282 5.736934  
H 13.574358 -5.430614 2.852985  
H 12.820225 -2.437639 5.885592  
H 14.425544 -3.705040 4.448205  
N 8.695283 -5.276990 7.272891  
C 9.093087 -5.249980 8.671658  
C 8.950429 -6.618796 9.347220  
O 9.801780 -7.004139 10.144645  
H 7.883796 -4.696051 7.024486  
H 10.183033 -5.008005 8.719035  
C 8.298582 -4.185195 9.468811  
H 8.427152 -3.167009 9.036881  
H 7.208128 -4.417405 9.477309  
H 8.640624 -4.148212 10.527263  
N 7.875996 -7.368889 8.997427  
C 7.615641 -8.732369 9.435780  
C 8.748050 -9.675767 9.014138  
O 9.204968 -10.494993 9.806073  
H 7.144468 -6.951229 8.409389  
H 7.604392 -8.747510 10.552253

C 6.244045 -9.227695 8.878637  
C 5.772852 -10.547825 9.471397  
C 6.278796 -11.812803 9.157848  
C 4.793488 -10.736566 10.425496  
N 5.603762 -12.725929 9.926722  
C 4.691244 -12.081649 10.702666  
C 3.988377 -9.801949 11.079999  
C 3.791765 -12.602135 11.625560  
C 3.052273 -10.289746 12.017005  
C 2.956217 -11.677204 12.288261  
H 5.462279 -8.454147 9.055419  
H 6.311651 -9.343270 7.772052  
H 7.080109 -12.095573 8.456218  
H 5.773998 -13.742461 9.919129  
H 4.069426 -8.718188 10.879032  
H 3.728239 -13.687039 11.833259  
H 2.392310 -9.577053 12.547269  
H 2.220119 -12.039456 13.031469  
N 9.205049 -9.540648 7.744320  
C 10.298441 -10.287456 7.142228  
C 11.636320 -10.017036 7.841689  
O 12.450172 -10.922720 7.997453  
H 8.749152 -8.867190 7.116314  
H 10.098775 -11.377142 7.282935  
C 10.394970 -9.949665 5.621378  
C 11.284182 -10.903612 4.836845  
C 12.681443 -10.889316 4.814052

C 10.884589 -11.975726 4.064901  
N 13.088916 -11.941180 4.034083  
C 12.000757 -12.610754 3.567827  
C 9.600383 -12.442330 3.776865  
C 11.936349 -13.733446 2.750783  
C 9.489816 -13.576414 2.943999  
C 10.647624 -14.216003 2.435621  
H 9.379177 -9.951992 5.164041  
H 10.775605 -8.909387 5.492544  
H 13.385209 -10.212332 5.324013  
H 14.071794 -12.186643 3.844758  
H 8.696771 -11.948496 4.177983  
H 12.847171 -14.228686 2.364356  
H 8.486503 -13.968380 2.690105  
H 10.540193 -15.106681 1.787066  
N 11.865996 -8.743934 8.254794  
C 13.029856 -8.309411 9.010646  
C 13.084501 -8.850430 10.445695  
O 14.164570 -8.912106 11.033161  
H 11.202928 -7.999020 8.003499  
H 13.943947 -8.714308 8.510820  
C 13.113275 -6.760620 9.055183  
H 13.127261 -6.315789 8.034315  
H 12.244776 -6.331256 9.606378  
H 14.037343 -6.433381 9.581891  
C -0.740598 -1.002156 0.442514  
O -0.232354 -1.903810 1.107725

C -2.247956 -0.914409 0.295429  
H -2.591370 -0.044661 -0.306358  
H -2.724281 -0.847545 1.298254  
H -2.627148 -1.837893 -0.195704  
N 11.918759 -9.230099 11.024809  
H 11.019916 -9.105877 10.541544  
C 11.789590 -9.795603 12.345320  
H 11.223745 -10.752352 12.306823  
H 12.781126 -10.004304 12.803120  
H 11.240803 -9.103939 13.020972

## 7 Full citations

Full citations for Gaussian,<sup>S8</sup> PSI4,<sup>S9</sup> Q-Chem,<sup>S10</sup> and AMBER<sup>S11</sup> are reported below.

### References

- (S1) Ren, P.; Ponder, J. W. *J. Phys. Chem. B* **2003**, *107*, 5933–5947.
- (S2) Laury, M. L.; Wang, L.-P.; Pande, V. S.; Head-Gordon, T.; Ponder, J. W. *J. Phys. Chem. B* **2015**, *119*, 9423–9437.
- (S3) Devereux, M.; Raghunathan, S.; Fedorov, D. G.; Meuwly, M. *J. Chem. Theory Comput.* **2014**, *10*, 4229–4241.
- (S4) Chaudret, R.; Piquemal, J.-P.; Andres Cisneros, G. *Phys. Chem. Chem. Phys.* **2011**, *13*, 11239–11247.
- (S5) Cisneros, G. A.; Perera, L.; García-Díaz, M.; Bebenek, K.; Kunkel, T. A.; Pedersen, L. G. *DNA Repair* **2008**, *7*, 1824–1834.

- (S6) Garcia-Diaz, M.; Bebenek, K.; Krahn, J. M.; Pedersen, L. C.; Kunkel, T. A. *DNA Repair* **2007**, *6*, 1333–1340.
- (S7) Vyas, R.; Reed, A. J.; Tokarsky, E. J.; Suo, Z. *J. Am. Chem. Soc.* **2015**, *137*, 5225–5230.
- (S8) Frisch, M. J.; Trucks, G. W.; Schlegel, H. B.; Scuseria, G. E.; Robb, M. A.; Cheeseman, J. R.; Scalmani, G.; Barone, V.; Mennucci, B.; Petersson, G. A.; Nakatsuji, H.; Caricato, M.; Li, X.; Hratchian, H. P.; Izmaylov, A. F.; Bloino, J.; Zheng, G.; Sonnenberg, J. L.; Hada, M.; Ehara, M.; Toyota, K.; Fukuda, R.; Hasegawa, J.; Ishida, M.; Nakajima, T.; Honda, Y.; Kitao, O.; Nakai, H.; Vreven, T.; Montgomery Jr., J. A.; Peralta, J. E.; Ogliaro, F.; Bearpark, M. J.; Heyd, J.; Brothers, E. N.; Kudin, K. N.; Staroverov, V. N.; Kobayashi, R.; Normand, J.; Raghavachari, K.; Rendell, A. P.; Burant, J. C.; Iyengar, S. S.; Tomasi, J.; Cossi, M.; Rega, N.; Millam, N. J.; Klene, M.; Knox, J. E.; Cross, J. B.; Bakken, V.; Adamo, C.; Jaramillo, J.; Gomperts, R.; Stratmann, R. E.; Yazyev, O.; Austin, A. J.; Cammi, R.; Pomelli, C.; Ochterski, J. W.; Martin, R. L.; Morokuma, K.; Zakrzewski, V. G.; Voth, G. A.; Salvador, P.; Dannenberg, J. J.; Dapprich, S.; Daniels, A. D.; Farkas, O.; Foresman, J. B.; Ortiz, J. V.; Cioslowski, J.; Fox, D. J. *Gaussian 09 Rev. D.01*. 2009.
- (S9) Turney, J. M.; Simmonett, A. C.; Parrish, R. M.; Hohenstein, E. G.; Evangelista, F. A.; Fermann, J. T.; Mintz, B. J.; Burns, L. A.; Wilke, J. J.; Abrams, M. L.; Russ, N. J.; Leininger, M. L.; Janssen, C. L.; Seidl, E. T.; Allen, W. D.; Schaefer, H. F.; King, R. A.; Valeev, E. F.; Sherrill, C. D.; Crawford, T. D. *WIREs Comput. Mol. Sci.* **2012**, *2*, 556–565.
- (S10) Shao, Y.; Gan, Z.; Epifanovsky, E.; Gilbert, A. T.; Wormit, M.; Kussmann, J.; Lange, A. W.; Behn, A.; Deng, J.; Feng, X.; Ghosh, D.; Goldey, M.; Horn, P. R.; Jacobson, L. D.; Kaliman, I.; Khaliullin, R. Z.; Ku, T.; Landau, A.; Liu, J.; Proynov, E. I.; Rhee, Y. M.; Richard, R. M.; Rohrdanz, M. A.; Steele, R. P.; Sundstrom, E. J.; Woodcock, H. L.; Zimmerman, P. M.; Zuev, D.; Albrecht, B.; Alguire, E.; Austin, B.;

Beran, G. J. O.; Bernard, Y. A.; Berquist, E.; Brandhorst, K.; Bravaya, K. B.; Brown, S. T.; Casanova, D.; Chang, C.-M.; Chen, Y.; Chien, S. H.; Closser, K. D.; Crittenden, D. L.; Diedenhofen, M.; DiStasio, R. A.; Do, H.; Dutoi, A. D.; Edgar, R. G.; Fatehi, S.; Fusti-Molnar, L.; Ghysels, A.; Golubeva-Zadorozhnaya, A.; Gomes, J.; Hanson-Heine, M. W.; Harbach, P. H.; Hauser, A. W.; Hohenstein, E. G.; Holden, Z. C.; Jagau, T.-C.; Ji, H.; Kaduk, B.; Khistyayev, K.; Kim, J.; Kim, J.; King, R. A.; Klunzinger, P.; Kosenkov, D.; Kowalczyk, T.; Krauter, C. M.; Lao, K. U.; Laurent, A. D.; Lawler, K. V.; Levchenko, S. V.; Lin, C. Y.; Liu, F.; Livshits, E.; Lochan, R. C.; Luenser, A.; Manohar, P.; Manzer, S. F.; Mao, S.-P.; Mardirossian, N.; Marenich, A. V.; Maurer, S. A.; Mayhall, N. J.; Neuscammann, E.; Oana, C. M.; Olivares-Amaya, R.; O'Neill, D. P.; Parkhill, J. A.; Perrine, T. M.; Peverati, R.; Prociuk, A.; Rehn, D. R.; Rosta, E.; Russ, N. J.; Sharada, S. M.; Sharma, S.; Small, D. W.; Sodt, A.; Stein, T.; Stck, D.; Su, Y.-C.; Thom, A. J.; Tsuchimochi, T.; Vanovschi, V.; Vogt, L.; Vydrov, O.; Wang, T.; Watson, M. A.; Wenzel, J.; White, A.; Williams, C. F.; Yang, J.; Yeganeh, S.; Yost, S. R.; You, Z.-Q.; Zhang, I. Y.; Zhang, X.; Zhao, Y.; Brooks, B. R.; Chan, G. K.; Chipman, D. M.; Cramer, C. J.; Goddard, W. A.; Gordon, M. S.; Hehre, W. J.; Klamt, A.; Schaefer, H. F.; Schmidt, M. W.; Sherrill, C. D.; Truhlar, D. G.; Warshel, A.; Xu, X.; Aspuru-Guzik, A.; Baer, R.; Bell, A. T.; Besley, N. A.; Chai, J.-D.; Dreuw, A.; Dunietz, B. D.; Furlani, T. R.; Gwaltney, S. R.; Hsu, C.-P.; Jung, Y.; Kong, J.; Lambrecht, D. S.; Liang, W.; Ochsenfeld, C.; Rassolov, V. A.; Slipchenko, L. V.; Subotnik, J. E.; Van Voorhis, T.; Herbert, J. M.; Krylov, A. I.; Gill, P. M.; Head-Gordon, M. *Mol. Phys.* **2014**, *113*, 184–215.

(S11) Case, D.; Berryman, J.; Betz, R.; Cerutti, D.; Cheatham, T. I.; Darden, T.; Duke, R.; Giese, T.; Gohlke, H.; Goetz, A.; N., H.; Izadi, S.; Janowski, P.; Kaus, J.; Kovalenko, A.; Lee, T.; LeGrand, S.; Li, P.; Luchko, T.; Luo, R.; Madej, B.; Merz, K.; Monard, G.; Needham, P.; Nguyen, H.; Nguyen, H.; Omelyan, I.; Onufriev, A.; Roe, D.; Roitberg, A.; Salomon-Ferrer, R.; Simmerling, C.; Smith, W.; Swails, J.; Walker, R.; Wang, J.;

Wolf, R.; Wu, X.; York, D.; Kollman, P. AMBER 2015. University of California, San Francisco, 2015.
